# Supplementary material for: Efficacy of Commercial Infectious Bronchitis Vaccines against Canadian Delmarva (DMV/1639) Infectious Bronchitis Virus Infection in Layers
Source: MDPI journal article supplement (doi:10.3390/vaccines10081194), 2022-07-27
Supplement: s1 [file s1]

**Table S1:** Comparative histopathology of trachea at 14 dpi following infection with the Canadian DMV/1639 strain (IBV/Ck/ Can/17–036989).

| Groups                                                      | VC                  |             |                 |               | NVC                 |             |                 |               | Control groups      |             |                 |               |
|-------------------------------------------------------------|---------------------|-------------|-----------------|---------------|---------------------|-------------|-----------------|---------------|---------------------|-------------|-----------------|---------------|
| Lesions in trachea                                          | No<br>change<br>(0) | Mild<br>(1) | Moderate<br>(2) | Severe<br>(3) | No<br>change<br>(0) | Mild<br>(1) | Moderate<br>(2) | Severe<br>(3) | No<br>change<br>(0) | Mild<br>(1) | Moderate<br>(2) | Severe<br>(3) |
| <b>Loss of epithelial lining</b>                            | 8/10                | 1/10        | 1/10            | 0/10          | 6/10                | 1/10        | 0/10            | 3/10          | 10/10               | 0/10        | 0/10            | 0/10          |
| <b>Loss of cilia</b>                                        | 7/10                | 1/10        | 2/10            | 0/10          | 5/10                | 0/10        | 2/10            | 3/10          | 10/10               | 0/10        | 0/10            | 0/10          |
| <b>Necrosis of epithelial lining</b>                        | 7/10                | 0/10        | 3/10            | 0/10          | 5/10                | 0/10        | 2/10            | 3/10          | 10/10               | 0/10        | 0/10            | 0/10          |
| <b>Inflammatory cell infiltration in the lamina propria</b> | 5/10                | 2/10        | 2/10            | 1/10          | 1/10                | 4/10        | 2/10            | 3/10          | 10/10               | 0/10        | 0/10            | 0/10          |

Mean of lesion scores from 10 hens in each group were compared using Kruskal–Wallis’ test followed by Dunn’s multiple comparisons test. Significance was assumed at  $p < 0.05$ .

**Table S2:** Comparative histopathology of lung at 14 dpi following infection with the Canadian DMV/1639 strain (IBV/Ck/ Can/17–036989).

| Groups                                                                                        | VC                  |             |                 |               | NVC                 |             |                 |               | Control groups      |             |                 |               |
|-----------------------------------------------------------------------------------------------|---------------------|-------------|-----------------|---------------|---------------------|-------------|-----------------|---------------|---------------------|-------------|-----------------|---------------|
| Lesions in lung                                                                               | No<br>change<br>(0) | Mild<br>(1) | Moderate<br>(2) | Severe<br>(3) | No<br>change<br>(0) | Mild<br>(1) | Moderate<br>(2) | Severe<br>(3) | No<br>change<br>(0) | Mild<br>(1) | Moderate<br>(2) | Severe<br>(3) |
| <b>Peribronchitis</b>                                                                         | 2/10                | 1/10        | 6/10            | 1/10          | 2/10                | 2/10        | 4/10            | 2/10          | 10/10               | 0/10        | 0/10            | 0/10          |
| <b>Inflammatory cell infiltrations in the interstitial tissue</b>                             | 7/10                | 3/10        | 0/10            | 0/10          | 5/10                | 3/10        | 1/10            | 1/10          | 10/10               | 0/10        | 0/10            | 0/10          |
| <b>Circulatory disturbances (hyperemia, edema, and hemorrhage in the interstitial tissue)</b> | 1/10                | 8/10        | 1/10            | 0/10          | 0/10                | 8/10        | 1/10            | 1/10          | 10/10               | 0/10        | 0/10            | 0/10          |

Mean of lesion scores from 10 hens in each group were compared using Kruskal–Wallis’ test followed by Dunn’s multiple comparisons test. Significance was assumed at  $p < 0.05$ .

**Table S3:** Comparative histopathology of kidney at 14 dpi following infection with the Canadian DMV/1639 strain (IBV/Ck/ Can/17–036989).

| Groups                                                           | VC               |             |                 |               | NVC              |             |                 |               | Control groups   |             |                 |               |
|------------------------------------------------------------------|------------------|-------------|-----------------|---------------|------------------|-------------|-----------------|---------------|------------------|-------------|-----------------|---------------|
|                                                                  | No change<br>(0) | Mild<br>(1) | Moderate<br>(2) | Severe<br>(3) | No change<br>(0) | Mild<br>(1) | Moderate<br>(2) | Severe<br>(3) | No change<br>(0) | Mild<br>(1) | Moderate<br>(2) | Severe<br>(3) |
| <b>Lesions in kidney</b>                                         |                  |             |                 |               |                  |             |                 |               |                  |             |                 |               |
| <b>Necrosis of ducto-tubular epithelium</b>                      | 7/10             | 2/10        | 0/10            | 1/10          | 6/10             | 2/10        | 1/10            | 1/10          | 10/10            | 0/10        | 0/10            | 0/10          |
| <b>Inflammatory cell infiltration in the interstitial tissue</b> | 6/10             | 0/10        | 0/10            | 4/10          | 5/10             | 2/10        | 1/10            | 2/10          | 10/10            | 0/10        | 0/10            | 0/10          |
| <b>Renal tubular dilatation</b>                                  | 6/10             | 3/10        | 1/10            | 0/10          | 5/10             | 4/10        | 0/10            | 1/10          | 10/10            | 0/10        | 0/10            | 0/10          |

Mean of lesion scores from 10 hens in each group were compared using Kruskal–Wallis’ test followed by Dunn’s multiple comparisons test. Significance was assumed at  $p < 0.05$ .

**Table S4:** Comparative histopathology of magnum at 14 dpi following infection with the Canadian DMV/1639 strain (IBV/Ck/ Can/17–036989).

| Groups                          | VC               |             |                 |               | NVC              |             |                 |               | Control groups   |             |                 |               |
|---------------------------------|------------------|-------------|-----------------|---------------|------------------|-------------|-----------------|---------------|------------------|-------------|-----------------|---------------|
|                                 | No change<br>(0) | Mild<br>(1) | Moderate<br>(2) | Severe<br>(3) | No change<br>(0) | Mild<br>(1) | Moderate<br>(2) | Severe<br>(3) | No change<br>(0) | Mild<br>(1) | Moderate<br>(2) | Severe<br>(3) |
| <b>Lesions in magnum</b>        |                  |             |                 |               |                  |             |                 |               |                  |             |                 |               |
| <b>Epithelial cell necrosis</b> | 4/10             | 4/10        | 2/10            | 0/10          | 5/10             | 0/10        | 4/10            | 1/10          | 10/10            | 0/10        | 0/10            | 0/10          |
| <b>Loss of cilia</b>            | 4/10             | 2/10        | 4/10            | 0/10          | 5/10             | 1/10        | 1/10            | 3/10          | 10/10            | 0/10        | 0/10            | 0/10          |
| <b>Tubular gland dilatation</b> | 6/10             | 3/10        | 1/10            | 0/10          | 4/10             | 5/10        | 1/10            | 0/10          | 10/10            | 0/10        | 0/10            | 0/10          |
| <b>Lymphocyte infiltration</b>  | 10/10            | 0/10        | 0/10            | 0/10          | 9/10             | 0/10        | 0/10            | 1/10          | 10/10            | 0/10        | 0/10            | 0/10          |
| <b>Edema in submucosa</b>       | 10/10            | 0/10        | 0/10            | 0/10          | 8/10             | 1/10        | 0/10            | 1/10          | 10/10            | 0/10        | 0/10            | 0/10          |

Mean of lesion scores from 10 hens in each group were compared using Kruskal–Wallis’ test followed by Dunn’s multiple comparisons test. Significance was assumed at  $p < 0.05$ .

**Table S5:** Comparative histopathology of isthmus at 14 dpi following infection with the Canadian DMV/1639 strain (IBV/Ck/ Can/17–036989).

| Groups                   | VC        |      |          |        | NVC       |      |          |        | Control groups |      |          |        |
|--------------------------|-----------|------|----------|--------|-----------|------|----------|--------|----------------|------|----------|--------|
|                          | No change | Mild | Moderate | Severe | No change | Mild | Moderate | Severe | No change      | Mild | Moderate | Severe |
| Lesions in isthmus       | (0)       | (1)  | (2)      | (3)    | (0)       | (1)  | (2)      | (3)    | (0)            | (1)  | (2)      | (3)    |
| Epithelial cell necrosis | 8/8       | 0/8  | 0/8      | 0/8    | 6/7       | 0/7  | 0/7      | 1/7    | 10/10          | 0/10 | 0/10     | 0/10   |
| Loss of cilia            | 8/8       | 0/8  | 0/8      | 0/8    | 5/7       | 1/7  | 0/7      | 1/7    | 10/10          | 0/10 | 0/10     | 0/10   |
| Tubular gland dilatation | 6/8       | 2/8  | 0/8      | 0/8    | 6/7       | 0/7  | 0/7      | 1/7    | 10/10          | 0/10 | 0/10     | 0/10   |
| Lymphocyte infiltration  | 5/8       | 2/8  | 1/8      | 0/8    | 4/7       | 2/7  | 0/7      | 1/7    | 10/10          | 0/10 | 0/10     | 0/10   |
| Edema in submucosa       | 4/8       | 2/8  | 2/8      | 0/8    | 2/7       | 0/7  | 1/7      | 4/7    | 10/10          | 0/10 | 0/10     | 0/10   |

Mean of lesion scores from 10 hens in the control groups, 8, and 7 hens in the VC and NVC groups, respectively, were compared using Kruskal–Wallis’ test followed by Dunn’s multiple comparisons test. Significance was assumed at  $p < 0.05$ .

**Table S6:** Comparative histopathology of uterus at 14 dpi following infection with the Canadian DMV/1639 strain (IBV/Ck/ Can/17–036989).

| Groups                   | VC        |      |          |        | NVC       |      |          |        | Control groups |      |          |        |
|--------------------------|-----------|------|----------|--------|-----------|------|----------|--------|----------------|------|----------|--------|
|                          | No change | Mild | Moderate | Severe | No change | Mild | Moderate | Severe | No change      | Mild | Moderate | Severe |
| Lesions in uterus        | (0)       | (1)  | (2)      | (3)    | (0)       | (1)  | (2)      | (3)    | (0)            | (1)  | (2)      | (3)    |
| Epithelial cell necrosis | 10/10     | 0/10 | 0/10     | 0/10   | 9/10      | 1/10 | 0/10     | 0/10   | 10/10          | 0/10 | 0/10     | 0/10   |
| Loss of cilia            | 10/10     | 0/10 | 0/10     | 0/10   | 9/10      | 1/10 | 0/10     | 0/10   | 10/10          | 0/10 | 0/10     | 0/10   |
| Tubular gland dilatation | 10/10     | 0/10 | 0/10     | 0/10   | 9/10      | 0/10 | 0/10     | 1/10   | 10/10          | 0/10 | 0/10     | 0/10   |
| Lymphocyte infiltration  | 10/10     | 0/10 | 0/10     | 0/10   | 9/10      | 0/10 | 0/10     | 1/10   | 10/10          | 0/10 | 0/10     | 0/10   |
| Edema in submucosa       | 4/10      | 1/10 | 5/10     | 0/10   | 4/10      | 1/10 | 1/10     | 4/10   | 10/10          | 0/10 | 0/10     | 0/10   |

Mean of lesion scores from 10 hens in each group were compared using Kruskal–Wallis’ test followed by Dunn’s multiple comparisons test. Significance was assumed at  $p < 0.05$ .
